# Supplementary material for: Polycyclic aromatic hydrocarbons as fuel-dependent markers in ship engine emissions using single-particle mass spectrometry
Source: Royal Society of Chemistry journal article supplement (doi:10.1039/d4ea00035h), 2024-01-01
Supplement: d4ea00035h1.pdf [file d4ea00035h1.pdf]

## Supplement

### Polycyclic Aromatic Hydrocarbons as Fuel Markers in Ship Engine Emissions using Single-Particle Mass Spectrometry

Lukas Anders<sup>a,b</sup>, Julian Schade<sup>a,b,c</sup>, Ellen Iva Rosewig<sup>a,b</sup>, Marco Schmidt<sup>a,b</sup>, Robert Irsig<sup>d</sup>, Seongho Jeong<sup>a,b,c</sup>, Uwe Käfer<sup>a,f</sup>, Thomas Gröger<sup>a</sup>, Jan Bendl<sup>a,c</sup>, Mohammad Reza Saraji-Bozorgzad<sup>a,c,d</sup>, Thomas Adam<sup>a,c</sup>, Uwe Etzien<sup>e</sup>, Hendryk Czech<sup>a</sup>, Bert Buchholz<sup>e</sup>, Thorsten Streibel<sup>a,b</sup>, Johannes Passig<sup>a,b,\*</sup> and Ralf Zimmermann<sup>a,b</sup>

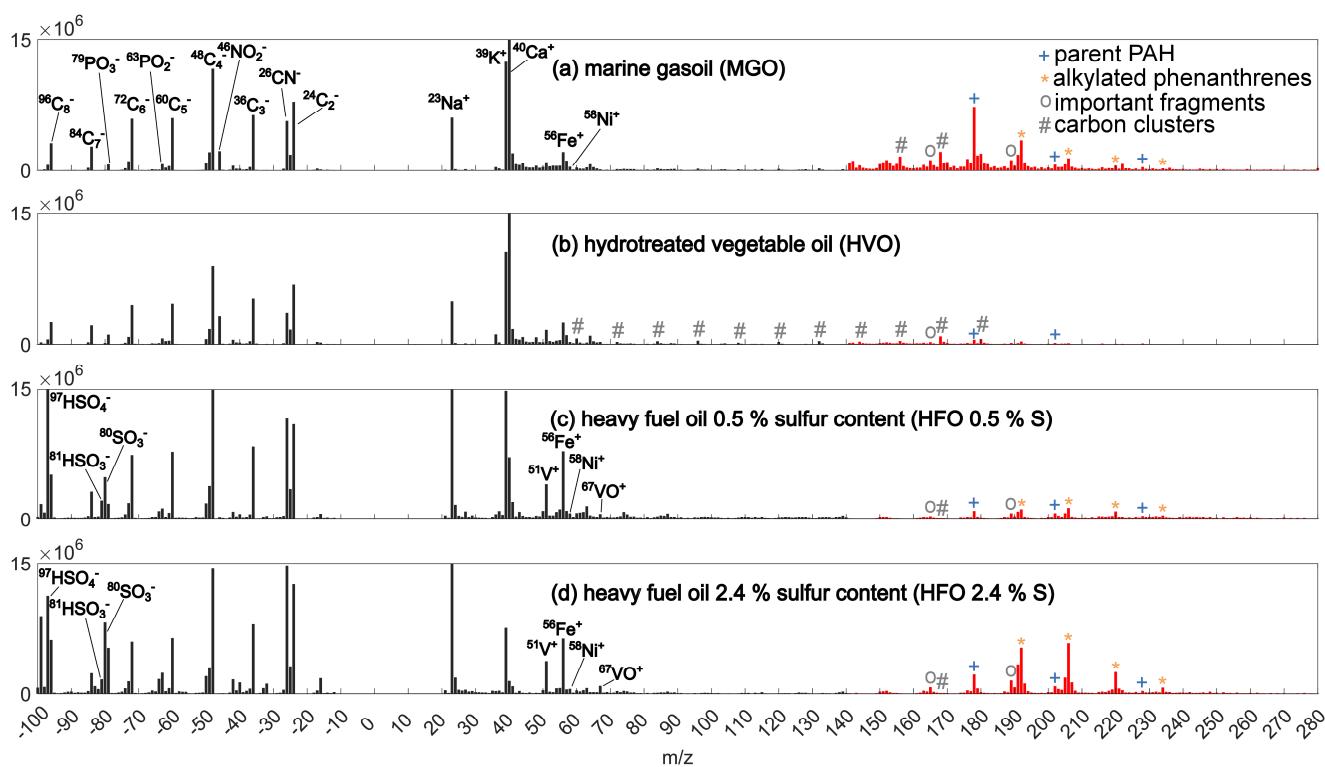

**Figure S1.** Sum mass spectra of particles from the four shipping fuels as in Fig. 1. Each spectrum shows the sum signal of 10,000 particles without normalization.

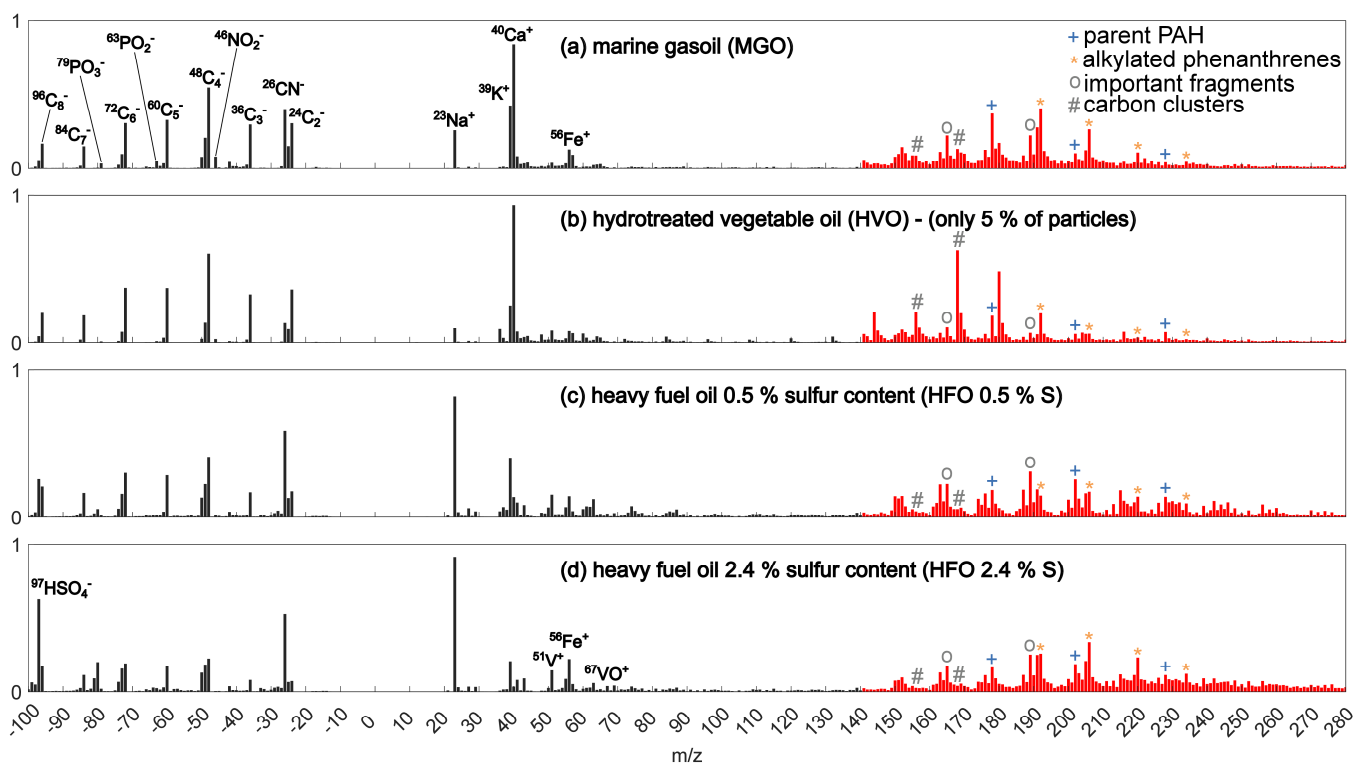

**Figure S2.** Sum mass spectra of four shipping fuels (a) marine gas oil (MGO), (b) hydrotreated vegetable oil (HVO), (c) heavy fuel oil 0.5 % S (HFO) and (d) heavy fuel oil 2.4 % S. LDI mass spectra (black) and REMPI spectra (red) for 20 kW (25 %) load of the research ship engine. Each spectrum shows 10,000 particles with individually normalized LDI and REMPI signals.

## Fuel Samples: GCxGC-HRTOFMS Method

All GCxGC-HRTOFMS experiments were carried out on a Pegasus 4D HRT 6000 series mass spectrometer platform (Leco, St. Joseph, MI, USA) with an Agilent Technologies 7890A gas chromatograph (Palo Alto, CA, USA) and OPTIC 4 programmed temperature vaporizing injector. For GCxGC capabilities, the system is equipped with a secondary oven and a cryogenic dual-stage liquid nitrogen modulator. All fuels were diluted in dichloromethane (10 % m/m) to reduce viscosity before injection. Data processing and visualization was conducted using ChromaTOF HRT (Leco, St. Joseph, MI, USA) similar to previously published approaches<sup>1,2</sup>. Briefly described, obtained raw spectra were post calibrated before deconvolution and peak picking. Peaks were assigned to chemical groups according to specific electron ionization fragments and retention time windows.

## Aromatic Compounds measured by GCxGC-HRTOFMS in Fuel Samples

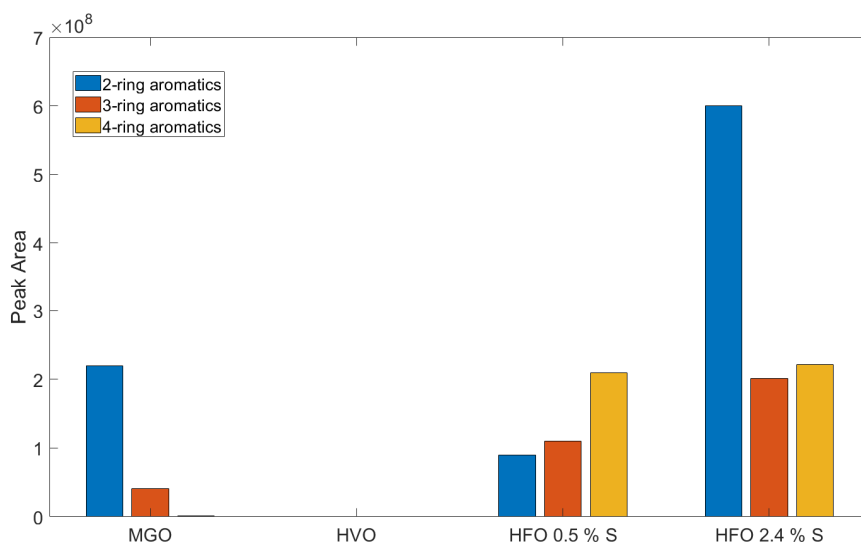

**Figure S3.** GCxGC-MS data showing 2-ring aromatics, 3-ring aromatics and 4-ring aromatics in marine gas oil (MGO), hydrotreated vegetable oil (HVO), heavy fuel oil (HFO) 0.5 % S and HFO 2.4 % S. It shows that most of these aromatics are present in the heavy fuel oils, while not detected in HVO.

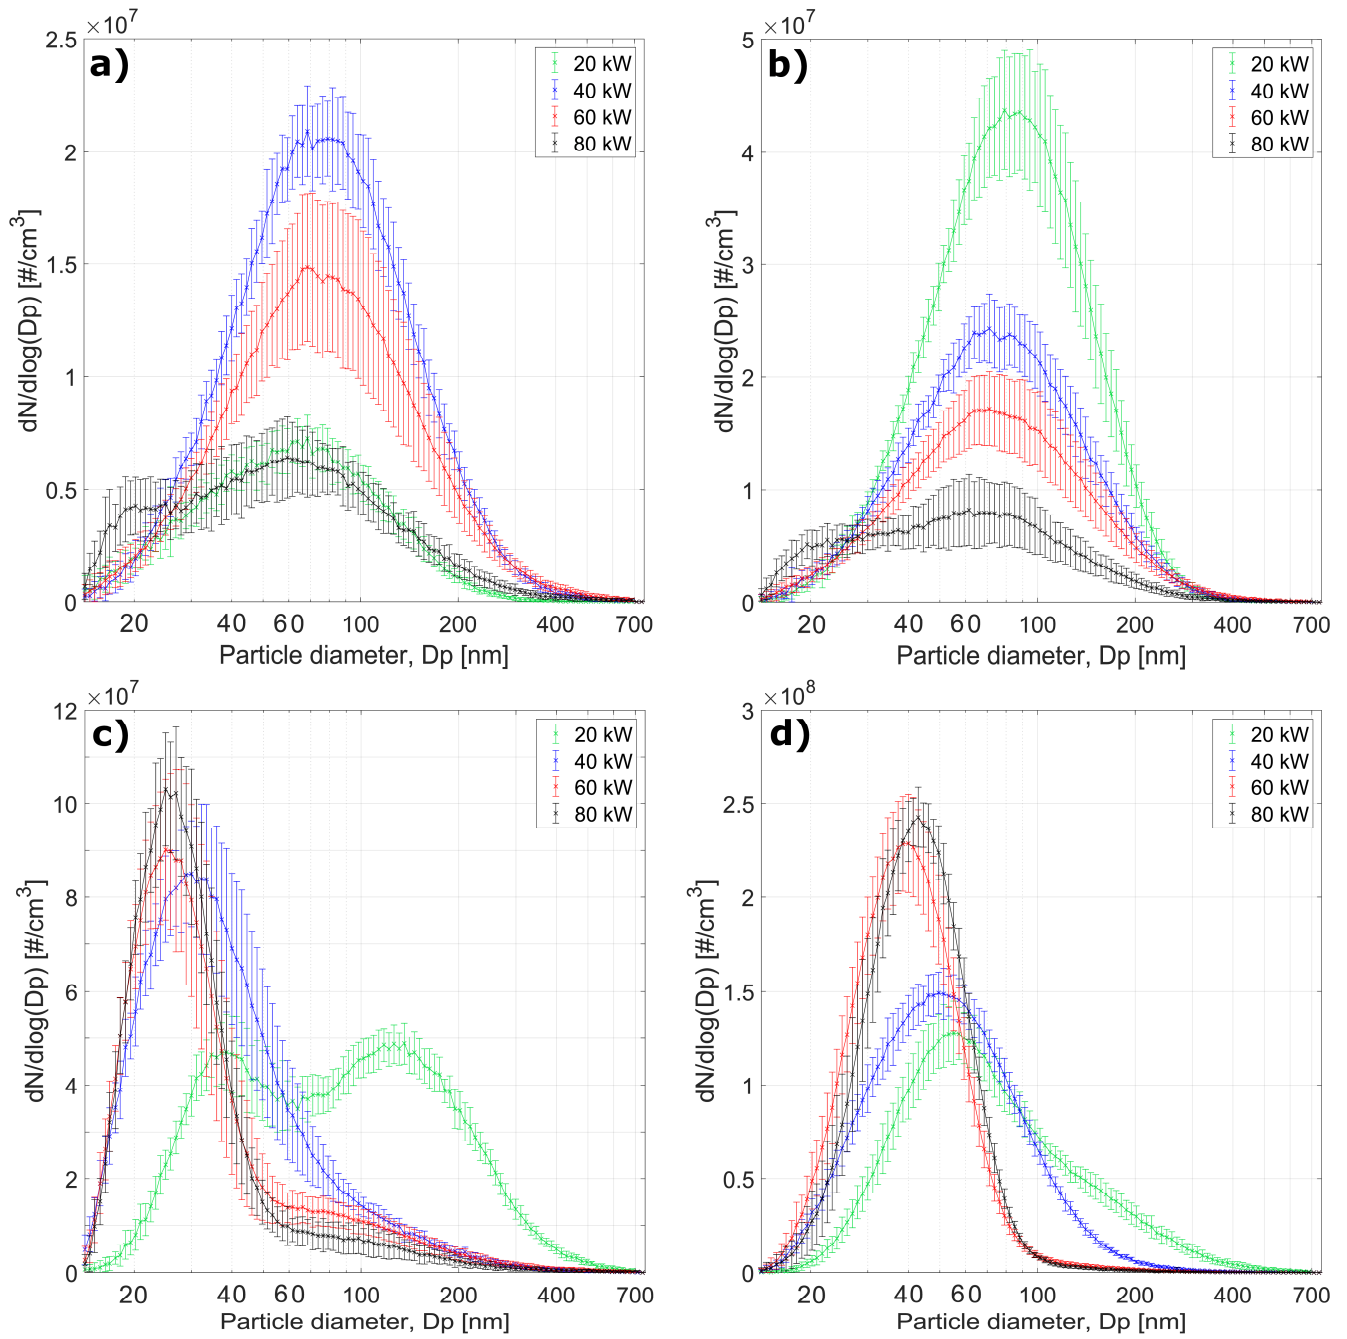

**Figure S4.** Particle size distributions, measured using the scanning mobility particle sizer for different shipping fuels: a) MGO, b) HVO, c) HFO 0.5 % S, d) HFO 2.4 % S.



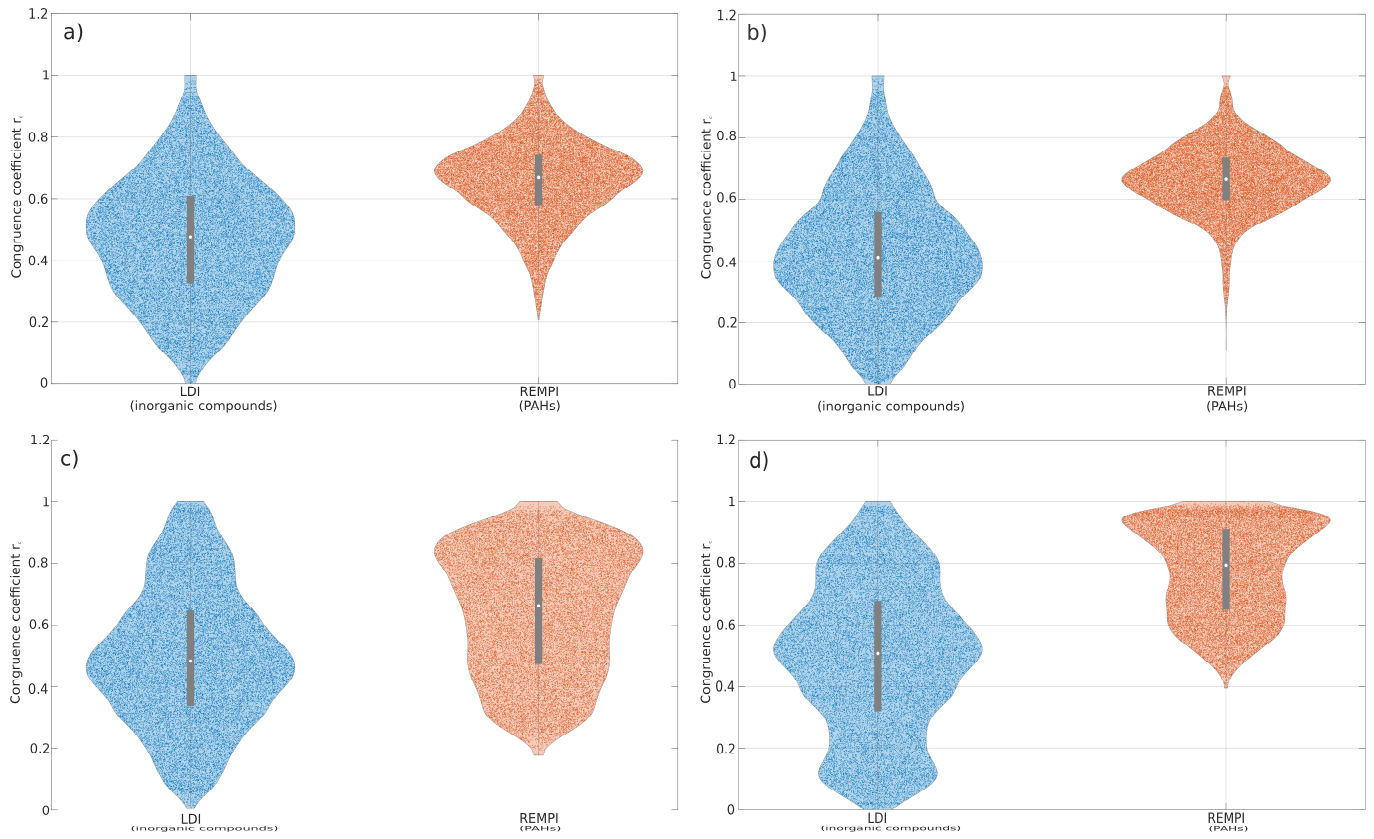

**Figure S5.** Violin plots of the congruence coefficients  $r_c$  between single-particle mass spectra from four different fuels, measured at an engine load of 20 kW: a) marine gasoil b) hydrotreated vegetable oil c) heavy fuel oil 0.5 % S d) heavy fuel oil 2.4 % S. The plot shows the congruence analysis of each fuel with the corresponding interquartile ranges for LDI and REMPI derived particles. For all fuels, there is a difference in the interquartile range between LDI and REMPI, supporting a higher variability in the inorganic particle composition and more uniform, fuel-dependent PAH signatures. For example, particles from the REMPI process have a consistently higher interquartile radius than those from the LDI process.

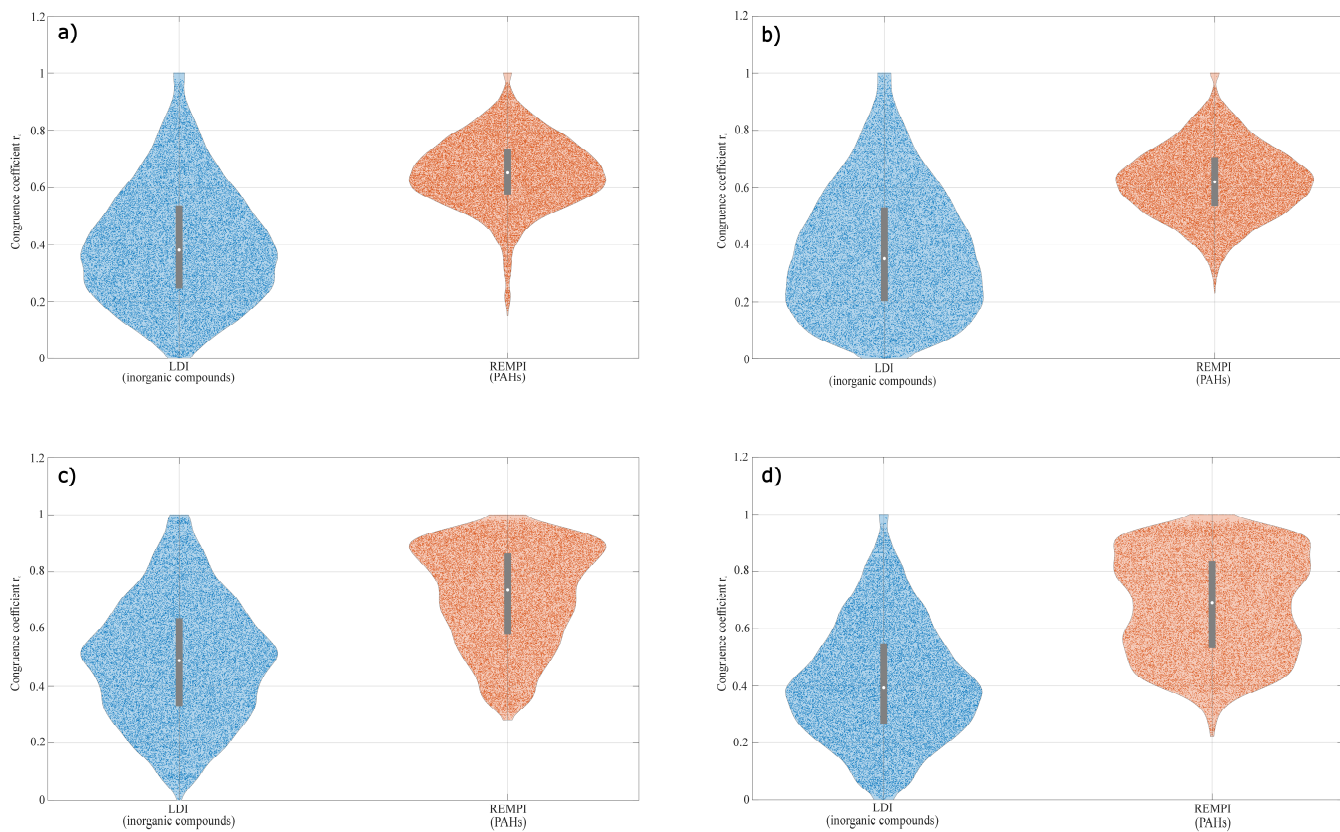

**Figure S6.** Violin plots of four different fuels at a load of 60 kW of the research engine: a) marine gasoil b) hydrotreated vegetable oil c) heavy fuel oil 0.5 % S d) heavy fuel oil 2.4 % S. Similar results can be observed for the low engine load (Fig. S5) and the higher load here.

## References

- 1 U. Käfer, T. Gröger, C. J. Rohbogner, D. Struckmeier, M. R. Saraji-Bozorgzad, T. Wilharm and R. Zimmermann, Detailed Chemical Characterization of Bunker Fuels by High-Resolution Time-of-Flight Mass Spectrometry Hyphenated to GC × GC and Thermal Analysis, *Energy Fuels*, 2019, **33**, 10745–10755.
- 2 A. Neumann, U. Käfer, T. Gröger, T. Wilharm, R. Zimmermann and C. P. Rüger, Investigation of Aging Processes in Bitumen at the Molecular Level with High-Resolution Fourier-Transform Ion Cyclotron Mass Spectrometry and Two-Dimensional Gas Chromatography Mass Spectrometry, *Energy Fuels*, 2020, **34**, 10641–10654.
